# Supplementary material
Source: PubMed Central journal article supplement (PMC5309913)
Supplement: JB.00670-16_zjb999094324s1.pdf [file JB.00670-16_zjb999094324s1.pdf]

**Table S1.** Oligonucleotides used in this study

|             |                                    |
|-------------|------------------------------------|
| 159 1       | GCTCTAGAGACGGATGGACCTTCGATCGCTCC   |
| 159 2       | GCTCTAGACCCTTCTGCGGTTGCGCGACCAGC   |
| 187 1       | GCTCTAGACGACCGGCAAGGGGCTGATGAGCC   |
| 187 2       | GCTCTAGACGGCCATCGACGATTCAAGAAC     |
| mcpAtagFw   | AAGCTTGCACCGCCGCCACTCTGG           |
| mcpAtagRv   | GAGCTCGAAAGTCCTCCCATCCGGGC         |
| cheAoprom   | CTGTCTCTGTGCGAAGAACCG              |
| pcheA42     | GCTCCAGCCCTTCCAGATCG               |
| Fwhyg       | GGATCCCGGGCCAGCTCCGCCATCGCC        |
| Rwhyg       | GGATCCGGCGGCCCGGGCGTCAGGC          |
| cheOpromFw  | GCTCTAGAGGCAAGGGCCATGCGCAT         |
| cheOpromRv  | GCGAATTCCTCGGGCAGGGTGCAGAAC        |
| cheOprommut | GCTCTAGAGGGCCCCAGAACGGCAGG         |
| cheY5XbaFw  | CTAGTCTAGACGCCATGGAGACGGCGATG      |
| cheY5PstRev | AAAAGTGCAGTCAGGCGCCGGCCACCTTCTTGAC |
| cheY6UP     | CGCGATATAGAGACGCATCATGGC           |
| tlpTdown    | CAGCTTCGCAGATGGTGGCGGCCAG          |
| cheOp2B     | GTCCCGGACAGGGTCAGTGGGGTCATC        |
| cheY4Fw     | CATGCCATGGCGACGAAAACCGTCCTCGCA     |
| cheY4Rev    | CGCGGATCCGGCCAAGAAGCTTCTTCATCAC    |
| flgHFw      | GCGAATTCTCGACCTATGTCGAGGACCGC      |
| flgHRv      | GCAAGCTTGAAGCGCTGCGAGAAGGAGAG      |

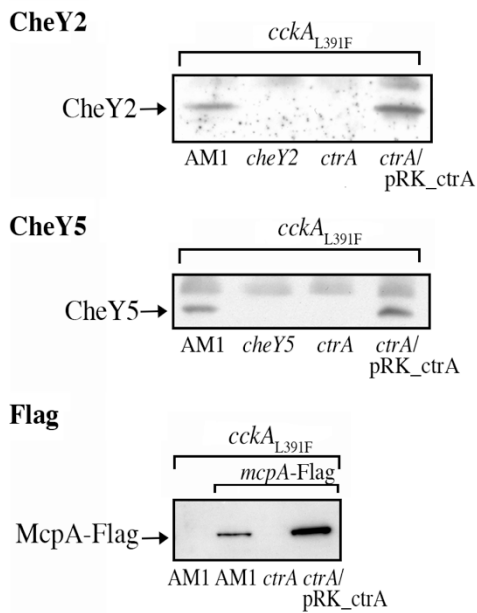

Fig. S1. Determination of the presence of CheY2, CheY5 and McpA-Flag in the strains AM1,  $\Delta ctrA$  and  $\Delta ctrA$  carrying the plasmid pRK\_ctrA. The experimental procedures to obtain the cells extracts and for blotting are described in Fig. 2A.

cccc<sup>\*</sup>TCA<sup>\*</sup>AA<sup>\*</sup>TAT<sup>\*</sup>CCCGCTGCGGG<sup>\*</sup>TCTCA<sup>\*</sup>ca<sup>\*</sup>gtg<sup>\*</sup>ccg<sup>\*</sup>gact<sup>\*</sup>ggg<sup>\*</sup>ca<sup>\*</sup>cg<sup>\*</sup>gacc<sup>\*</sup>g<sup>\*</sup>ccg<sup>\*</sup>tg<sup>\*</sup>ct

tcgaggcaggatgagcggatgcagagcaggagataccggatcggcagaaccgatcggg<sup>\*</sup>cg<sup>\*</sup>gagg<sup>\*</sup>caaggcc

ATG ACG AAA ACC GTC CTC GCA GTG GAC

M T K T V L A V D

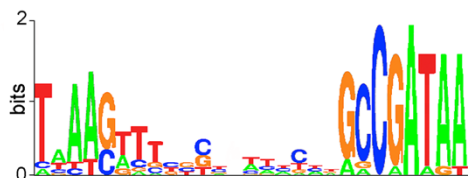

Fig. S2. Nucleotide sequence upstream of *cheY4*. The first residues of CheY4 are shown below the corresponding codons. The putative Shine-Dalgarno sequence is underlined, and

nucleotides similar to the  $\sigma^{28}$  consensus promoter are shown in bold and capital letters. The LOGO sequence of the  $\sigma^{28}$  consensus promoter obtained from [http://prodoric.tu-bs.de/vfp/vfp\\_promoter.php](http://prodoric.tu-bs.de/vfp/vfp_promoter.php) is shown. Asterisks at the upper part of the sequence indicate nucleotides that match with the most frequent base in the LOGO sequence.

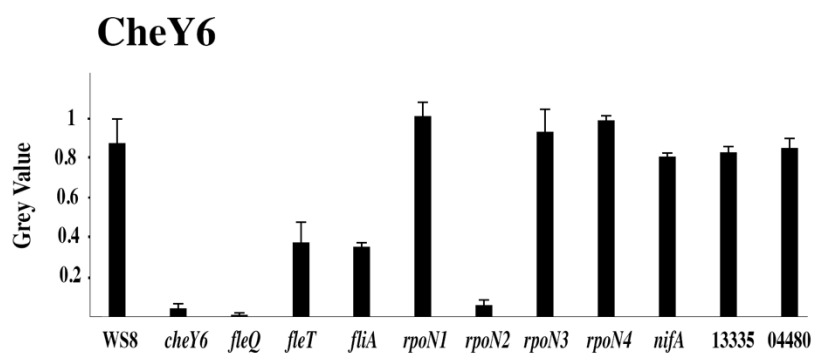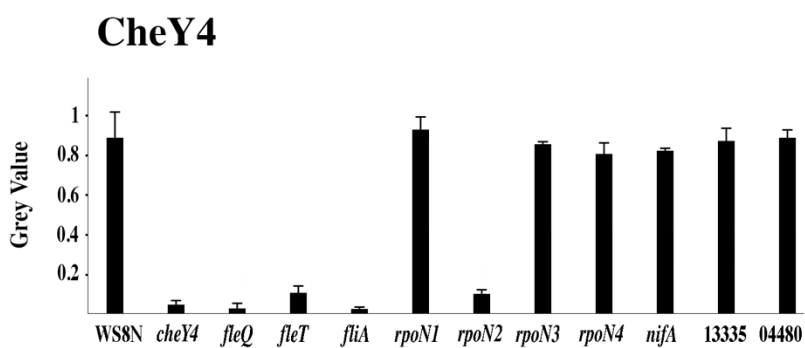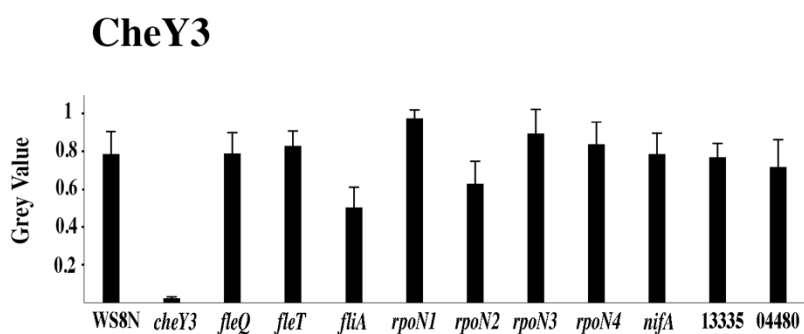

Fig. S3. Quantification of the CheY levels in different mutant strains. The value of each column is the average of three independent experiments. Image analysis was done with Image J.
